# Supplementary material for: Assessing the Effects of Trematode Infection on Invasive Green Crabs in Eastern North America
Source: PubMed Central journal article supplement (PMC4451766; doi:10.1371/journal.pone.0128674), 2015-06-01
Supplement: pone.0128674.s005.pdf [file pone.0128674.s005.pdf]

| <b>Assessed Behaviors</b>                             | <b>Regression with cyst intensity</b> |                    |
|-------------------------------------------------------|---------------------------------------|--------------------|
|                                                       | R <sup>2</sup>                        | p                  |
| <b><i>Behaviors recorded in Ethogram</i></b>          |                                       |                    |
| Walking                                               | 0.0131                                | 0.3533             |
| Standing                                              | 0.0159                                | 0.3060             |
| Climbing walls                                        | 0.0096                                | 0.4282             |
| Walking/climbing on shelter                           | 0.0199                                | 0.2512             |
| On shelter                                            | 0.0052                                | 0.5624             |
| Under shelter                                         | 0.0444                                | 0.0843             |
| Next to shelter                                       | 0.0001                                | 0.9125             |
| <i>All shelter related behaviors</i>                  | 0.0148                                | 0.3232             |
| Handling, cracking, opening mussels                   | 0.0078                                | 0.4755             |
| Consuming mussels                                     | 0.0208                                | 0.2404             |
| <i>All foraging related behaviors</i>                 | 0.0014                                | 0.7618             |
| <i>Active/conspicuous behaviors</i>                   | 0.0151                                | 0.3177             |
| <i>Inactive behaviors</i>                             | 0.0225                                | 0.2217             |
| <b><i>Timed behaviors (seconds)</i></b>               |                                       |                    |
| Total time spent in association with shelter          | 0.0160                                | 0.3044             |
| Mussel encounter time (search time)                   | 0.0001                                | 0.9304             |
| Mussel handling time (avg)                            | <b>0.2378</b>                         | <b>&lt;0.0001*</b> |
| Mussel handling time (avg) (possible outlier removed) | <b>0.1230</b>                         | <b>0.0050*</b>     |
| <b><i>Mussels consumed after 30 min</i></b>           |                                       |                    |
| Proportion of mussels consumed (out of 5)             | 0.0150                                | 0.3123             |
